# Supplementary material for: Integrated super-hydrophobic and antireflective PDMS bio-templated from nano-conical structures of cicada wings
Source: Royal Society of Chemistry journal article supplement (doi:10.1039/c6ra23811d), 2016-01-01
Supplement: c6ra23811d1.pdf [file c6ra23811d1.pdf]

## Supplementary Information

### **Integrated super-hydrophobic and antireflective PDMS bio-templated from nano-conical structures of cicada wings**

Yan Liu<sup>a</sup>, Yunyun Song<sup>a</sup>, Shichao Niu<sup>a,\*</sup>, Yonglai Zhang<sup>b</sup>, Zhiwu Han<sup>a</sup>, Luquan Ren<sup>a</sup>

<sup>a</sup> Key Laboratory of Bionic Engineering, Ministry of Education, Jilin University, Changchun 130022, China.

<sup>b</sup> State Key Laboratory on Integrated Optoelectronics, College of Electronic Science and Engineering, Jilin University, 2699 Qianjin Street, Changchun 130012, China.

\*Corresponding author: niushichao@jlu.edu.cn

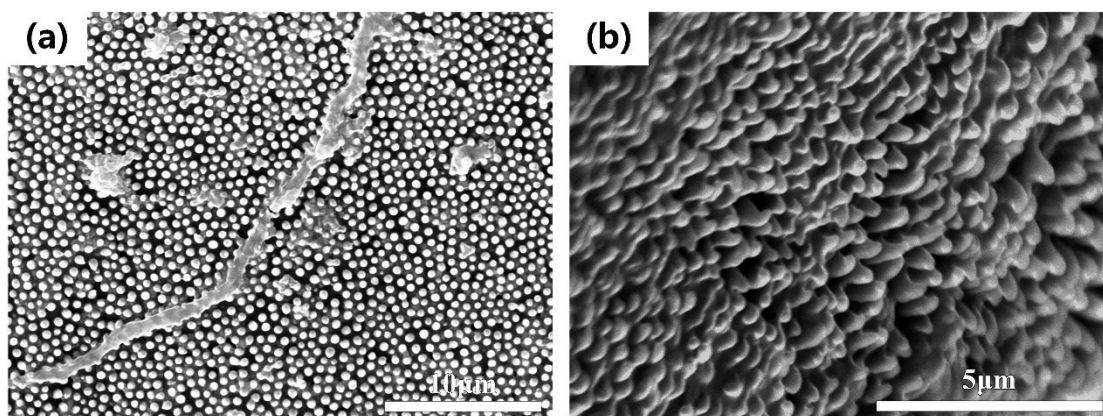

**Figure. S1:** Conical structures of cicada wings.

(a) The top appearance of cicada wings under lower magnification. (b) Tilted-view SEM image of the specimen.

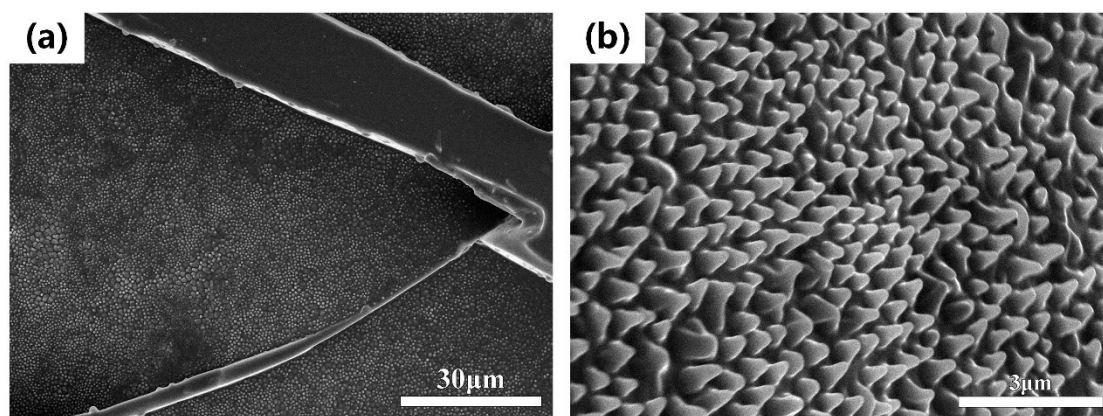

**Figure. S2:** Nano-cones structures of PDMS positive replica.

(a) The top appearance of PDMS positive replica under lower magnification. (b) Tilted-view SEM image of the positive replica.

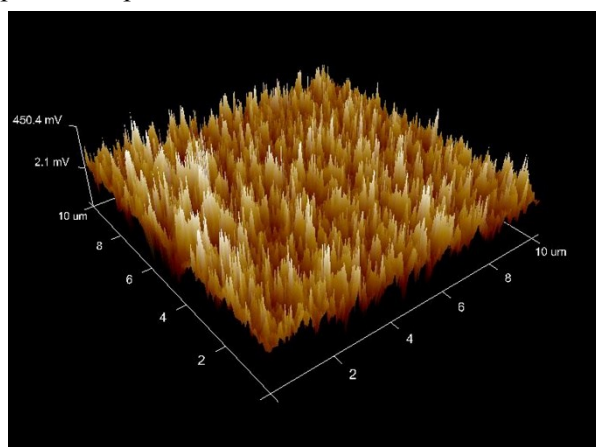

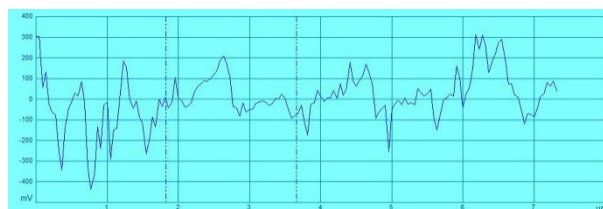

**Figure. S3:** AFM images of nanoscale roughness on top of the nano-cones. The heights of PDMS positive replica ranged between 200nm and 300nm which were lower than cicada wings.

**Table S1:** The comparison of surface energy about the cicada wings, SiO<sub>2</sub> negative replica, planar PDMS and PDMS positive replica.

Comparison of Surface Energy of Cicada Wings, SiO<sub>2</sub> negative replica, Glass Slide, Planar PDMS and PDMS positive replica

| Items                            | SiO <sub>2</sub><br>negative<br>replica | glass slide | Planar<br>PDMS | PDMS<br>positive<br>replica | Cicada<br>wings |
|----------------------------------|-----------------------------------------|-------------|----------------|-----------------------------|-----------------|
| Surface free<br>energy<br>(mN/m) | 65.24                                   | 50.22       | 15.44          | -11.34                      | -15.35          |

### Supplementary Videos

**V1:** A 3  $\mu$ L drop placed on the surface of SiO<sub>2</sub> negative replica. The negative replica is completely permeable, and the water passes through to form an interface with the glass slide beneath.
